# Supplementary material for: Three-Dimensional Mineral Prospectivity Modeling with the Integration of Ore-Forming Computational Simulation in the Xiadian Gold Deposit, Eastern China
Source: MDPI journal article supplement (doi:10.3390/app131810277), 2023-09-13
Supplement: s1 [file s1]

**Table S1.** The detailed coordinates of controls points for gold targets at Xiadian.

| Targets  | X        | Y       |
|----------|----------|---------|
| Target 1 | 40530275 | 4108825 |
|          | 40530000 | 4108450 |
|          | 40530225 | 4108200 |
|          | 40530475 | 4108575 |
| Target 2 | 40530450 | 4108875 |
|          | 40530575 | 4109250 |
|          | 40530700 | 4109200 |
|          | 40530600 | 4108900 |
|          | 40531000 | 4108425 |
|          | 40530900 | 4108150 |
| Target 3 | 40532275 | 4108075 |
|          | 40531125 | 4108100 |
|          | 40532050 | 4107675 |
|          | 40532000 | 4108000 |
|          | 40532300 | 4108100 |
|          | 40531650 | 4108250 |
|          | 40531525 | 4108425 |
|          | 40531825 | 4108900 |
|          | 40532425 | 4108875 |
|          | 40532500 | 4108300 |
| Target 4 | 40532025 | 4110250 |
|          | 40532400 | 4110250 |
|          | 40532500 | 4110250 |
|          | 40531850 | 4110025 |
|          | 40531975 | 4109725 |
|          | 40531450 | 4109575 |
|          | 40531475 | 4109575 |
|          | 40530950 | 4109775 |
|          | 40531500 | 4110125 |
